# Supplementary material for: Boosting the value of insoluble dietary fiber to increase gut fermentability through food processing
Source: Royal Society of Chemistry journal article supplement (doi:10.1039/d1fo02146j), 2021-01-01
Supplement: d1fo02146j1.pdf [file d1fo02146j1.pdf]

Table S1. Composition dietary fiber fractions from pearl millet defatted whole grain flour (dry basis)

|                                        | % (SD) <sup>a</sup> |                    |
|----------------------------------------|---------------------|--------------------|
|                                        | Soluble fraction    | Insoluble fraction |
| Moisture                               | 8.6 (0.8)           | 6.1 (0.1)          |
| Ash                                    | 6.4 (0.1)           | 0.6 (0.4)          |
| Protein                                | 1.0 (0.2)           | 2.2 (0.1)          |
| Lignin                                 | -                   | 17.1 (0.9)         |
| Starch                                 | 0.5 (0.1)           | 1.2 (0.1)          |
| Nonstarch polysaccharides <sup>b</sup> | 84                  | 73                 |

<sup>a</sup> Values are the average of duplicate measurements. Standard deviation (SD) are presented on parenthesis

<sup>b</sup> Values for nonstarch polysaccharides content were estimated by difference [100- (Moisture % + Ash % + Protein % + Lignin % + Starch %) = NSPs]

Table S2. Mean of Firmicutes to Bacteroidetes ratios during incubations.

| Time | Firmicutes/Bacteroidetes |                          |                           |                          |                          |
|------|--------------------------|--------------------------|---------------------------|--------------------------|--------------------------|
|      | Blank                    | FOS                      | MF                        | MMF                      | MEMF                     |
| 0    | 1.6 (0.2) <sup>BCD</sup> |                          |                           |                          |                          |
| 6    | 1.2 (0.1) <sup>CDE</sup> | 2.0 (0.1) <sup>AB</sup>  | 1.3 (0.1) <sup>CDE</sup>  | 1.1 (0.1) <sup>DE</sup>  | 2.5 (0.2) <sup>A</sup>   |
| 12   | 1.7 (0.0) <sup>BC</sup>  | 2.0 (0.1) <sup>AB</sup>  | 1.4 (0.1) <sup>BCDE</sup> | 1.5 (0.0) <sup>BCD</sup> | 2.0 (0.2) <sup>AB</sup>  |
| 24   | 1.8 (0.1) <sup>BC</sup>  | 1.5 (0.2) <sup>BCD</sup> | 0.9 (0.0) <sup>E</sup>    | 1.0 (0.0) <sup>DE</sup>  | 1.2 (0.0) <sup>CDE</sup> |

Data presented as mean value (S.E.), n=3, different letters indicate statistical differences of treatment groups using one-way ANOVA followed by Tukey's Post-hoc analysis. Ratios were calculated for each sample based on a rarefied dataset of 25,000 sequences per sample (fructooligosaccharides – FOS; native millet fiber – MF; microwave-treated millet fiber – MMF; microwave and enzymatically-treated millet fiber – MEMF).

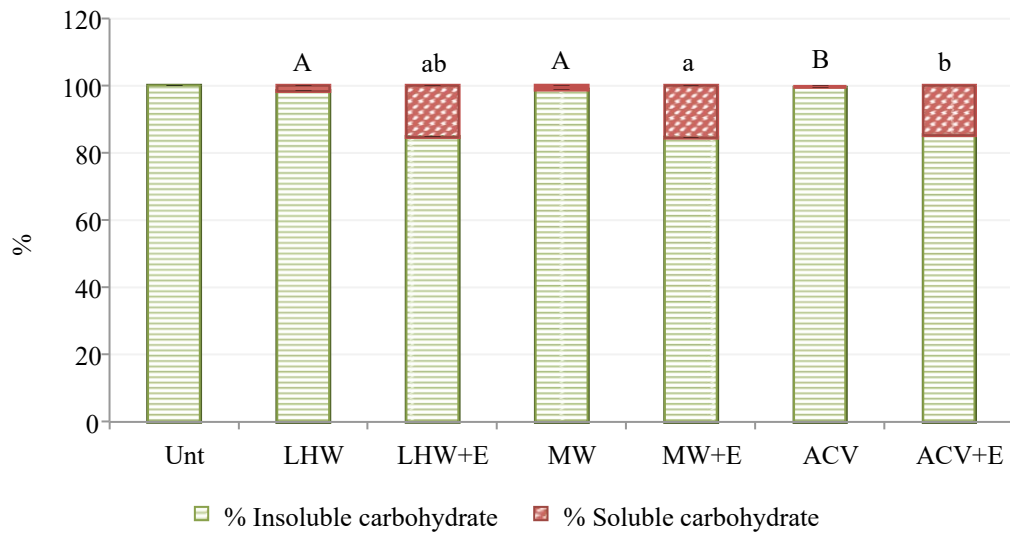

Fig. S1. Insoluble and soluble carbohydrate content of water-suspended pearl millet insoluble dietary fiber after hydrothermal treatments and enzymatic hydrolysis. Abbreviations: Unt = untreated insoluble dietary fiber; LHW = liquid hot water-treated insoluble dietary fiber; MW = microwave-treated insoluble dietary fiber; ACV = autoclave-treated insoluble dietary fiber; E = enzymatically hydrolyzed insoluble dietary fiber. Significant differences ( $P < 0.05$ ) are shown as letters above each column; upper case letters indicate differences between hydrothermal treatments; lower case letter indicate differences between hydrothermal + enzymatic treatment. Values are the averages of duplicate measurements

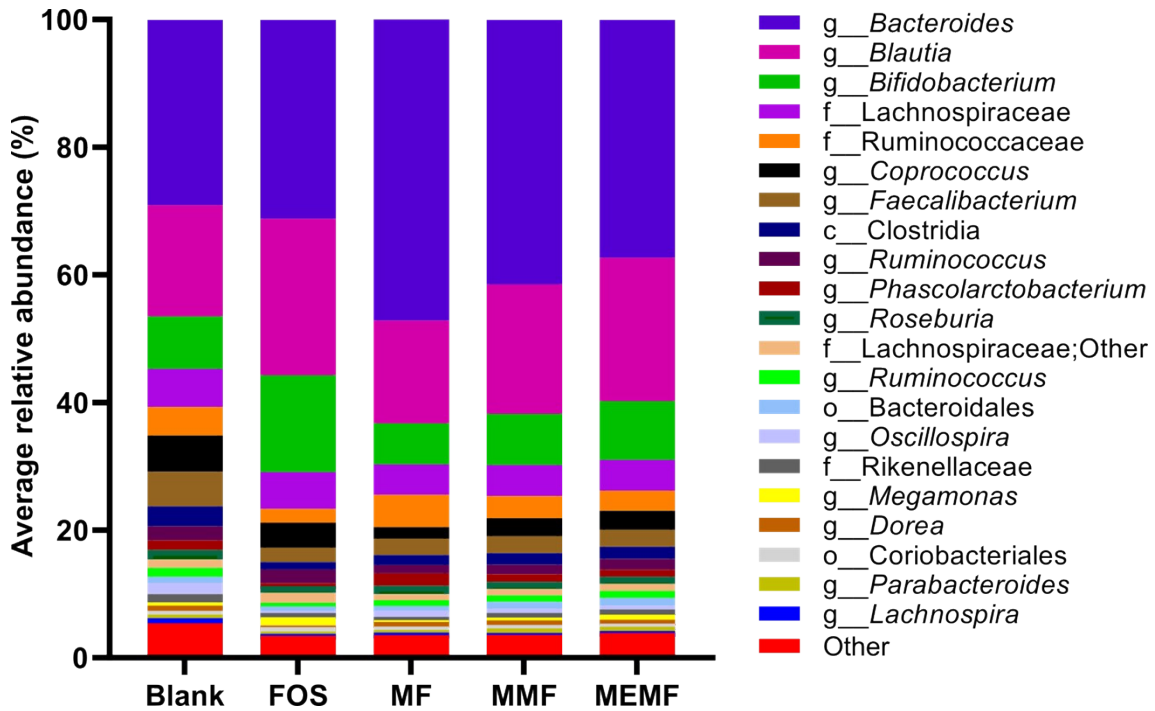

Fig. S2. Average relative abundance (%) of bacteria after 24 h *in vitro* fecal fermentation with fructooligosaccharides (FOS); native millet fiber (MF); microwave-treated millet fiber (MMF); microwave and enzymatically-treated millet fiber (MEMF); compared to the blank. Taxa were collapsed at the genus level and reported as the last classified taxonomic level (c, class; o, order; f, family; g, genus).
